# Supplementary material for: Unanticipated mechanisms of covalent inhibitor and synthetic ligand cobinding to PPARγ
Source: eLife. 2024 Nov 18;13:RP99782. doi: 10.7554/eLife.99782 (PMC11573348; doi:10.7554/eLife.99782)
Supplement: Figure 3—source data 1. [file elife-99782-fig3-data1.xlsx]

## Sheet: NCoR1
Ligand (micromolar)	BVT.13			MRL24			nTZDpa			SR1664			GW9662-BVT,13			GW9662-MRL24			GW9662-nTZDpa			GW9662-SR1664			T0070907-BVT13			T0070907-MRL24			T0070907-nTZDpa			T0070907-SR1664
6.66667	0.79	0.79	0.73	0.956	0.942	0.916	0.853	0.838	0.826	0.97	1.011	0.962	0.872	0.841	0.859	0.618	0.605	0.582	0.915	0.931	0.872	0.96	0.946	0.932	2.116	2.136	2.061	0.925	0.926	0.897	0.684	0.671	0.675	1.719	1.752	1.71
2.22222	0.839	0.786	0.75	0.957	0.963	0.923	0.779	0.764	0.723	1.043	1.05	1.01	1.008	1.021	0.984	0.624	0.615	0.586	0.863	0.867	0.829	0.943	0.898	0.916	2.486	2.428	2.535	1.08	1.08	1.088	0.954	0.908	0.92	2.23	2.217	2.229
0.740741	0.835	0.808	0.756	0.952	0.965	0.894	0.7	0.687	0.653	1.013	1.068	1.005	1.122	1.147	1.082	0.634	0.607	0.608	0.909	0.887	0.841	0.983	0.957	0.953	2.651	2.623	2.579	1.454	1.411	1.384	1.727	1.647	1.607	2.487	2.531	2.498
0.246914	0.852	0.813	0.814	0.953	0.928	0.892	0.646	0.667	0.624	1.049	1.057	0.978	1.212	1.207	1.181	0.688	0.664	0.641	0.997	1.028	0.973	1.061	1.039	1	2.706	2.758	2.652	2.013	1.908	1.897	2.36	2.24	2.211	2.646	2.675	2.59
0.082305	0.84	0.832	0.752	0.945	0.937	0.875	0.675	0.685	0.636	0.974	0.969	0.952	1.199	1.209	1.161	0.747	0.753	0.719	1.156	1.135	1.117	1.088	1.095	1.033	2.755	2.7	2.736	2.406	2.303	2.309	2.648	2.557	2.497	2.725	2.764	2.66
0.027435	0.843	0.792	0.783	0.95	0.921	0.883	0.679	0.692	0.688	0.954	0.939	0.885	1.223	1.192	1.195	0.892	0.886	0.863	1.23	1.184	1.163	1.183	1.229	1.132	2.748	2.722	2.649	2.619	2.525	2.499	2.763	2.763	2.64	2.735	2.707	2.657
0.009145	0.834	0.814	0.79	0.93	0.923	0.929	0.717	0.768	0.715	0.915	0.878	0.862	1.241	1.215	1.185	1.05	1.052	1.016	1.223	1.205	1.202	1.193	1.233	1.204	2.729	2.749	2.69	2.696	2.665	2.611	2.733	2.761	2.689	2.777	2.843	2.688
0.003048	0.841	0.811	0.752	0.921	0.95	0.904	0.787	0.787	0.76	0.871	0.88	0.852	1.227	1.227	1.199	1.158	1.128	1.142	1.241	1.227	1.222	1.193	1.228	1.172	2.681	2.736	2.724	2.788	2.769	2.628	2.787	2.712	2.589	2.759	2.736	2.722
0.001016	0.822	0.818	0.723	0.952	0.936	0.904	0.81	0.814	0.799	0.867	0.846	0.802	1.199	1.207	1.194	1.222	1.15	1.143	1.236	1.226	1.223	1.239	1.222	1.208	2.725	2.775	2.631	2.696	2.777	2.712	2.728	2.763	2.644	2.745	2.777	2.715
0.000339	0.863	0.8	0.771	0.903	0.877	0.836	0.81	0.84	0.813	0.863	0.828	0.823	1.227	1.218	1.221	1.241	1.231	1.185	1.242	1.224	1.165	1.213	1.257	1.21	2.63	2.721	2.713	2.742	2.723	2.692	2.779	2.747	2.634	2.746	2.806	2.67
0.000113	0.825	0.793	0.772	0.877	0.859	0.841	0.87	0.837	0.873	0.829	0.843	0.84	1.215	1.209	1.217	1.276	1.195	1.207	1.199	1.229	1.196	1.24	1.212	1.172	2.777	2.792	2.652	2.779	2.728	2.763	2.735	2.7	2.688	2.769	2.729	2.681

## Sheet: TRAP220 MED1
Ligand (micromolar)	BVT.13			MRL24			nTZDpa			SR1664			GW9662-BVT,13			GW9662-MRL24			GW9662-nTZDpa			GW9662-SR1664			T0070907-BVT13			T0070907-MRL24			T0070907-nTZDpa			T0070907-SR1664
6.66667	1.096	1.132	1.046	1.302	1.295	1.278	0.913	0.904	0.949	0.78	0.76	0.766	0.912	0.889	0.851	0.933	0.931	0.913	0.725	0.703	0.706	0.582	0.568	0.575	0.575	0.57	0.552	0.967	0.986	0.965	0.342	0.35	0.331	0.461	0.476	0.474
2.22222	1.111	1.144	1.068	1.196	1.17	1.16	0.678	0.687	0.657	0.802	0.823	0.783	0.846	0.834	0.806	0.934	0.929	0.877	0.737	0.767	0.76	0.597	0.597	0.612	0.456	0.475	0.447	0.951	0.921	0.899	0.393	0.407	0.405	0.47	0.46	0.444
0.740741	1.139	1.134	1.086	1.183	1.171	1.075	0.562	0.571	0.547	0.836	0.821	0.814	0.818	0.78	0.752	0.913	0.909	0.884	0.731	0.741	0.726	0.633	0.617	0.637	0.426	0.427	0.422	0.84	0.864	0.8	0.521	0.546	0.522	0.444	0.431	0.438
0.246914	1.179	1.15	1.086	1.146	1.139	1.123	0.515	0.528	0.528	0.925	0.917	0.849	0.746	0.764	0.728	0.929	0.9	0.887	0.722	0.715	0.73	0.67	0.669	0.624	0.407	0.413	0.411	0.665	0.68	0.652	0.548	0.532	0.523	0.43	0.436	0.418
0.082305	1.194	1.168	1.093	1.125	1.115	1.087	0.55	0.537	0.529	0.964	0.979	0.939	0.741	0.75	0.696	0.88	0.91	0.866	0.717	0.729	0.726	0.671	0.681	0.642	0.406	0.406	0.386	0.553	0.566	0.531	0.466	0.483	0.497	0.428	0.436	0.414
0.027435	1.198	1.148	1.069	1.124	1.142	1.096	0.605	0.569	0.582	1.053	1.022	1.003	0.744	0.735	0.697	0.83	0.844	0.807	0.721	0.726	0.7	0.715	0.695	0.688	0.414	0.403	0.406	0.494	0.476	0.448	0.453	0.451	0.467	0.412	0.418	0.433
0.009145	1.173	1.18	1.091	1.118	1.129	1.083	0.721	0.682	0.648	1.134	1.13	1.088	0.701	0.729	0.698	0.818	0.819	0.79	0.743	0.733	0.709	0.714	0.693	0.723	0.399	0.394	0.395	0.443	0.435	0.44	0.459	0.464	0.454	0.438	0.42	0.407
0.003048	1.171	1.162	1.087	1.149	1.107	1.076	0.848	0.871	0.822	1.161	1.184	1.17	0.732	0.742	0.691	0.807	0.779	0.747	0.734	0.739	0.718	0.738	0.746	0.744	0.409	0.396	0.401	0.422	0.443	0.428	0.453	0.46	0.463	0.439	0.422	0.414
0.001016	1.192	1.185	1.109	1.156	1.137	1.074	1.003	1.014	1.003	1.19	1.206	1.134	0.743	0.694	0.693	0.758	0.739	0.732	0.742	0.734	0.714	0.737	0.737	0.719	0.394	0.415	0.386	0.413	0.432	0.401	0.464	0.457	0.441	0.428	0.419	0.42
0.000339	1.172	1.202	1.13	1.155	1.168	1.123	1.116	1.128	1.094	1.181	1.206	1.159	0.715	0.726	0.708	0.743	0.715	0.708	0.737	0.759	0.745	0.765	0.74	0.714	0.403	0.407	0.388	0.436	0.435	0.415	0.462	0.461	0.458	0.432	0.431	0.426
0.000113	1.185	1.217	1.112	1.153	1.158	1.146	1.171	1.212	1.122	1.197	1.215	1.155	0.75	0.725	0.712	0.746	0.747	0.731	0.769	0.753	0.725	0.764	0.739	0.727	0.429	0.424	0.397	0.432	0.426	0.41	0.467	0.486	0.46	0.454	0.45	0.44

## Sheet: IC50 EC50
	apo + NCoR1			GW9662 + NCoR1			T0070907 + NCoR1			apo + TRAP220/MED1			GW9662 + TRAP220/MED1			T0070907 + TRAP220/MED1
	Mean	Upper limit	Lower limit	Mean	Upper limit	Lower limit	Mean	Upper limit	Lower limit	Mean	Upper limit	Lower limit	Mean	Upper limit	Lower limit	Mean	Upper limit	Lower limit
BVT.13				-5.422	-5.577	-5.246	-4.621	-5.106					-5.761	-6.095	-5.383	-4.173	-4.908
SR1664	-7.58	-7.874	-7.297	-6.947	-7.13	-6.762	-5.254	-5.401	-5.081	-8.532	-8.625	-8.417				-7.045
MRL24	-9.667		-8.865	-7.647	-7.72	-7.574	-6.478	-6.529	-6.428				-7.761	-7.999	-7.527	-6.504	-6.564	-6.443
nTZDpa	-8.82	-9.82	-8.102	-6.754	-6.907	-6.604	-6.046	-6.116	-5.975	-7.245	-7.394	-7.096	-6.914	-7.246	-6.573	-5.504	-6.096	-3.82
